# Supplementary material
Source: MDPI journal article supplement (https://www.mdpi.com/2673-4532/4/4/31)
Supplement: s1 [file s1]

Archive with 1 entries (1 files):
- analytica-2662474-supplementary.pdf
